# Supplementary material for: High prevalence of SARS-CoV-2 antibodies and low prevalence of SARS-CoV-2 RNA in cats recently exposed to human cases
Source: PubMed Central journal article supplement (PMC11232172; doi:10.1186/s12917-024-04150-4), 2024-07-09
Supplement: 12917_2024_4150_MOESM2_ESM.pdf [file 12917_2024_4150_MOESM2_ESM.pdf]

**Supplementary material: Questionnaires – S2**

Questionnaires (French version p. 8) developed to collect information on cat- and household-level characteristics and management, and about clinical signs in cats. Questionnaire 1 was used during the first visit within 15 days of the confirmation of the index case, and the Questionnaire 2 was used for subsequent visits.

**English version – Questionnaire 1: Transmission dynamics of SARS-CoV-2 in household pets: a one health approach in British Columbia and Quebec**

**A. Household information**

|                                                                                                                                                                                                                                                                                                                                                       |
|-------------------------------------------------------------------------------------------------------------------------------------------------------------------------------------------------------------------------------------------------------------------------------------------------------------------------------------------------------|
| Date interview completed: DD/MM/YYYY      Interviewer Name: _____                                                                                                                                                                                                                                                                                     |
| Household ID: _____                                                                                                                                                                                                                                                                                                                                   |
| Who is providing information?<br><input type="checkbox"/> Index COVID-19 case <input type="checkbox"/> Other, specify name: _____      Relationship to index case:<br>_____                                                                                                                                                                           |
| How many people are currently living in the household? _____                                                                                                                                                                                                                                                                                          |
| How many pets belong to the household? (include service animals and any animals that primarily live outside if the household members consider them “pets” and interact with them regularly).<br><input type="checkbox"/> none <input type="checkbox"/> cats # _____ <input type="checkbox"/> dogs # _____ <input type="checkbox"/> other (list) _____ |

**B. COVID-19 case information**

|                                                                                                                                                                     |
|---------------------------------------------------------------------------------------------------------------------------------------------------------------------|
| How many people in the household have COVID-19? _____                                                                                                               |
| <b>For the first (index) case in the household:</b> Age: _____ Gender: <input type="checkbox"/> Male <input type="checkbox"/> Female <input type="checkbox"/> Other |
| Relationship to household pet(s): _____                                                                                                                             |
| Date of onset of clinical signs: dd/mm/yy <input type="checkbox"/> N/A because no clinical signs      Date of diagnosis: dd/mm/yy                                   |
| Clinical signs: <input type="checkbox"/> no clinical signs                                                                                                          |
| <input type="checkbox"/> fever                      start date: dd/mm/yy      end date: dd/mm/yy                                                                    |



**C. Household cat information** (complete this set of questions for each pet)

1. Cat's name: \_\_\_\_\_ Animal ID: \_\_\_\_\_  
 a. Primary caretaker of [PET NAME]: \_\_\_\_\_  Index COVID-19 case  Other  
 \_\_\_\_\_  
 b. Breed of cat: \_\_\_\_\_  
 c. Age of cat (years/months): \_\_\_\_\_ years or months (circle one)  
 d. Sex of cat:  Male  Female  
 .Has [PET NAME] been spayed/neutered:  Yes  No

2. Does [PET NAME] have any current health conditions:  Yes  No  
 a. If yes, please describe these health conditions or illnesses including when they started:

| Condition | Date Started | Medications or supplement for the condition |
|-----------|--------------|---------------------------------------------|
|           |              |                                             |
|           |              |                                             |
|           |              |                                             |

b. Please describe any other medications or supplements that [PET NAME] takes.

3. On a regular day **on the week before** [index COVID-19 CASE] was diagnosed or first showed clinical signs of COVID-19, how many days a week, how long per day, and what types of interaction/contact did [COVID-19 CASE] usually have with [PET NAME]?

| Types of interaction/contact with pet                                | Number of days per week | Average daily duration of interaction/contact (hours or minutes) |
|----------------------------------------------------------------------|-------------------------|------------------------------------------------------------------|
| <input type="checkbox"/> petting                                     |                         |                                                                  |
| <input type="checkbox"/> cuddling (e.g. holding in arms or carrying) |                         |                                                                  |
| <input type="checkbox"/> letting lick face or hands                  |                         |                                                                  |
| <input type="checkbox"/> cleaning litter box                         |                         |                                                                  |

|                                                              |  |  |
|--------------------------------------------------------------|--|--|
| <input type="checkbox"/> brushing or cleaning cat            |  |  |
| <input type="checkbox"/> cat sleeping on you                 |  |  |
| <input type="checkbox"/> cat rests or sleeps in same bedroom |  |  |
| <input type="checkbox"/> cat rests or sleeps in same bed     |  |  |
| <input type="checkbox"/> feeding by hand (e.g giving treats) |  |  |
| <input type="checkbox"/> Other (please describe)             |  |  |

If there is more than one animal in the house:  no other animals in the household

4. On a regular day **on the week before** [index COVID-19 CASE] was diagnosed or first showed clinical signs of COVID-19, how many days a week, how long per day, and what types of interaction/contact did [PET Name] usually have with other animals?

| <b>Types of interaction/contact between pets</b>        | <b>Number of days per week</b> | <b>Average daily duration of interaction/contact (hours or minutes)</b> |
|---------------------------------------------------------|--------------------------------|-------------------------------------------------------------------------|
| <input type="checkbox"/> playing                        |                                |                                                                         |
| <input type="checkbox"/> resting/sleeping together      |                                |                                                                         |
| <input type="checkbox"/> licking/grooming each other    |                                |                                                                         |
| <input type="checkbox"/> eating from the same food bowl |                                |                                                                         |

|                                                  |  |  |
|--------------------------------------------------|--|--|
| <input type="checkbox"/> Other (please describe) |  |  |
|--------------------------------------------------|--|--|

5. On a regular day **in the week after** [COVID-19 CASE] was diagnosed or first showed clinical signs, how many days a week, how long per day and what types of interaction/contact did [COVID-19 CASE] usually have with [PET NAME]?

| Types of interaction/contact with pet                                | Number of days per week | Average daily duration of interaction/contact (hours or minutes) |
|----------------------------------------------------------------------|-------------------------|------------------------------------------------------------------|
| <input type="checkbox"/> petting                                     |                         |                                                                  |
| <input type="checkbox"/> cuddling (e.g. holding in arms or carrying) |                         |                                                                  |
| <input type="checkbox"/> letting lick face or hands                  |                         |                                                                  |
| <input type="checkbox"/> cleaning litter box                         |                         |                                                                  |
| <input type="checkbox"/> brushing or cleaning cat                    |                         |                                                                  |
| <input type="checkbox"/> cat sleeping on you                         |                         |                                                                  |
| <input type="checkbox"/> cat rests or sleeps in same bedroom         |                         |                                                                  |
| <input type="checkbox"/> cat rests or sleeps in same bed             |                         |                                                                  |
| <input type="checkbox"/> feeding by hand (e.g giving treats)         |                         |                                                                  |
| <input type="checkbox"/> Other (please describe)                     |                         |                                                                  |

6. Was [COVID-19 CASE] wearing any personal protective equipment (e.g. gloves or a cloth face covering)?

Yes  No

If yes, please describe: \_\_\_\_\_

7. **Prior to** [index COVID-19 case] being diagnosed or began showing clinical signs did [PET NAME] reside:  indoors,  outdoors or  both?

a. If both, what percent of time is spent indoors? \_\_\_\_\_ %

b. If outdoors or both, does [PET NAME] go outside the limit of the household (beyond the yard)?  
\_\_\_\_\_

c. If outdoors, on average how many people does [PET NAME] interact with other than members of the household? \_\_\_\_\_

d. Is [PET NAME] allowed anywhere in the house or restricted to certain areas? \_\_\_\_\_

e. If restricted, specify where:

8. On a regular day **in the week after** [index COVID-19 case] was diagnosed or began to show clinical signs did [PET NAME] reside:  indoors,  outdoors or  both?

a. If both, what percent of time is spent indoors? \_\_\_\_\_ %

b. If outdoors or both, does [PET NAME] go outside the limit of the household (beyond the yard)?  
\_\_\_\_\_

c. If outdoors, on average how many people does [PET NAME] interact with other than members of the household? \_\_\_\_\_

d. Was [PET NAME] allowed anywhere in the house or restricted to certain areas? \_\_\_\_\_

e. If restricted, specify where:

9. On a regular day **in the week after** [index COVID-19 case] was diagnosed or began to show clinical signs, how many days a week, how long per day, and what types of interaction/contact did [PET NAME] usually have with other household pets?  Not applicable, no other household pets

| Types of interaction/contact between pets               | Number of days per week | Average daily duration of interaction/contact (hours or minutes) |
|---------------------------------------------------------|-------------------------|------------------------------------------------------------------|
| <input type="checkbox"/> playing together               |                         |                                                                  |
| <input type="checkbox"/> resting/sleeping together      |                         |                                                                  |
| <input type="checkbox"/> licking/grooming each other    |                         |                                                                  |
| <input type="checkbox"/> eating from the same food bowl |                         |                                                                  |
| <input type="checkbox"/> Other (please describe)        |                         |                                                                  |

10. Since [COVID-19 case] was diagnosed, has this pet developed any new health condition (mark all that apply and indicate start date and duration of symptoms)?

- Coughing      Start date: dd/mm/yy      End date: dd/mm/yy
- Runny nose      Start date: dd/mm/yy      End date: dd/mm/yy
- Sneezing      Start date: dd/mm/yy      End date: dd/mm/yy
- Vomiting      Start date: dd/mm/yy      End date: dd/mm/yy
- Difficulty breathing or shortness of breath      Start date: dd/mm/yy      End date: dd/mm/yy
- Diarrhea      Start date: dd/mm/yy      End date: dd/mm/yy
- Lethargy      Start date: dd/mm/yy      End date: dd/mm/yy
- Other (please describe): \_\_\_\_\_
- Start date: dd/mm/yy      End date: dd/mm/yy

11. Is there any additional information you think we should know about [PET NAME]?

a. If Yes, please describe:

12. Do you consent to the collection of samples from [PET NAME] on 2 occasions, 10 days apart?

You have the right to withdraw consent at any time. The samples that will be collected from [PET NAME] are:

- Blood sample
- Nasal swab
- Oral swab
- Rectal swab

Yes     No

## Version française – Questionnaire 1 – Étude COVID chats

Date de l'entrevue:

Nom de l'enquêteur:

### Informations sur le foyer

1. Numéro d'identification du foyer:

2. Qui fournit l'information?

Cas de COVID-19 confirmé

Autre, lien avec le cas confirmé: \_\_\_\_\_

3. Combien de personnes vivent dans ce foyer présentement? \_\_\_\_\_

4. Ce foyer comporte combien d'animaux de compagnie? (incluant les animaux d'assistance et aussi tous les animaux qui vivent principalement à l'extérieur si les membres du foyer les considèrent comme des animaux de compagnie et qu'ils interagissent avec eux régulièrement)

aucun

chats # \_\_\_\_\_

chiens # \_\_\_\_\_

autre (préciser) \_\_\_\_\_

### Informations sur les personnes infectées par la COVID-19 dans le foyer

5. Combien de personnes dans ce foyer sont positives à la COVID-19? \_\_\_\_\_

***Premier cas confirmé [CAS DE COVID-19 INDEXÉ] - Si plus d'un cas confirmé : Compléter à nouveau les questions 7 à 11 pour chacun des cas.***

6. Quelle est l'année de naissance de [CAS DE COVID-19 INDEXÉ]? \_\_\_\_\_

7. Son genre?

Homme

Femme

Autre



8. La date de son diagnostic (confirmation du test positif)?:

9.1 Êtes-vous vaccinés contre la COVID-19 ? :

- Oui, 1 dose
- Oui, 2 doses
- Non

Précisez le type de vaccin :

10. [CAS DE COVID-19 INDEXÉ] a-t-il eu des symptômes qui peuvent être attribuables à la COVID-19 jusqu'à présent?

- Aucun signe clinique
- Fièvre - Date de début: jj/mmm/aa Date de fin: jj/mmm/aa
- Toux - Date de début: jj/mmm/aa Date de fin: jj/mmm/aa
- Difficultés respiratoires ou essoufflement - Date de début: jj/mmm/aa Date de fin: jj/mmm/aa
- Perte de l'odorat et du goût - Date de début: jj/mmm/aa Date de fin: jj/mmm/aa
- Fatigue intense - Date de début: jj/mmm/aa Date de fin: jj/mmm/aa
- Diarrhée ou vomissements - Date de début: jj/mmm/aa Date de fin: jj/mmm/aa
- Autres (veuillez préciser): \_\_\_\_\_ - Date de début: jj/mmm/aa Date de fin: jj/mmm/aa

11. *Le jour de l'échantillonnage* : [CAS DE COVID-19 INDEXÉ] a-t-il des symptômes attribuables à la COVID-19 aujourd'hui?

- Aucun signe clinique
- Fièvre
- Toux
- Difficultés respiratoires ou essoufflement
- Perte de l'odorat et du goût
- Fatigue intense
- Diarrhée ou vomissements
- Autres (veuillez préciser): \_\_\_\_\_

**Information sur le chat du foyer (compléter ces questions pour chaque chat)**

12. Nu. d'identification de l'animal:

13. Quel est le nom de l'animal?

14. Son âge (ans/mois):

15. Son sexe ? :  Mâle  Femelle

16. Sa race?

17. Est-ce que [NOM DE L'ANIMAL] est stérilisé? :  Oui  Non

18. Est-ce que [NOM DE L'ANIMAL] a un ou des problème(s) de santé connu(s):  Oui  Non

Si oui, veuillez décrire ce(s) problème(s) de santé ou maladie(s), incluant la date de leur début et tout médicament ou supplément actuellement utilisé pour traiter ce problème.

| Problème de santé | Date du début | Médicament ou supplément pour traiter ce problème |
|-------------------|---------------|---------------------------------------------------|
|                   |               |                                                   |
|                   |               |                                                   |
|                   |               |                                                   |

19. Veuillez mentionner tout autre médicament ou supplément que vous donnez à [NOM DE L'ANIMAL].

20. Au cours des 2 dernières semaines, quel % de son temps [NOM DE L'ANIMAL] a-t-il passé à l'extérieur? \_\_\_\_\_%.

**Section portant sur les 7 jours précédant le diagnostic positif de [CAS DE COVID-19 INDEXÉ]**

21. **Au cours des 7 jours précédant le diagnostic positif** de [CAS DE COVID-19 INDEXÉ], combien y a-t-il eu de jours où il y a eu ce type de contacts avec [NOM DE L'ANIMAL]?

|                                                    | Nombre de jours parmi les 7 jours |
|----------------------------------------------------|-----------------------------------|
| Caresser ou prendre l'animal dans ses bras         |                                   |
| Prendre l'animal dans ses bras                     |                                   |
| Laisser l'animal lui lécher le visage ou les mains |                                   |
| Nettoyer la litière de l'animal                    |                                   |

|                                                                                                         |  |
|---------------------------------------------------------------------------------------------------------|--|
| Brossez ou nettoyez l'animal                                                                            |  |
| Laissez le chat dormir sur soi                                                                          |  |
| Laisser le chat passer du temps dans la même pièce                                                      |  |
| Nourrir à la main (ex. donner des gâteries)                                                             |  |
| Autre contact (précisez; ex. donner de la nourriture de table qu'une personne infectée aurait touché) : |  |

***Si plus d'un animal dans le foyer :***

23. **Au cours des 7 jours précédant le diagnostic positif** de [CAS DE COVID-19 INDEXÉ], combien y a-t-il eu de jours où [NOM DE L'ANIMAL] interagissait avec vos autres animaux de compagnie?

|                                                                          | Nombre de jours parmi les 7 jours |
|--------------------------------------------------------------------------|-----------------------------------|
| Jouer ensemble                                                           |                                   |
| Dormir/se reposer ensemble                                               |                                   |
| Lavage et léchage mutuel                                                 |                                   |
| Contact avec l'urine ou les fèces des autres animaux                     |                                   |
| Partager de la nourriture dans un même bol (en même temps?<br>Oui / Non) |                                   |
| Autre contact (précisez) :                                               |                                   |

25. Est-ce que [CAS DE COVID-19] a changé le type de contact qu'il a avec [NOM DE L'ANIMAL] **suivant son diagnostic positif?**

Si Oui : poursuivre

Si Non : sauter à la question 28

→ 28. Pendant ces interactions, [CAS DE COVID-19 INDEXÉ] portait-il alors un équipement de protection individuelle (ex. gants ou couvre-visage)?

Oui  Non

Si oui, veuillez préciser:

29. Avant ces interactions, [CAS DE COVID-19 INDEXÉ] se lave-t-il toujours les mains?

Oui  Non

Si oui, veuillez préciser:

30. **Depuis la confirmation du diagnostic** de [CAS DE COVID-19 INDEXÉ], est-ce que [NOM DE L'ANIMAL] est libre de circuler à l'extérieur?

Oui  Non

Si oui, veuillez préciser:

31. **Depuis la confirmation du diagnostic** de [CAS DE COVID-19 INDEXÉ], est-ce que [NOM DE L'ANIMAL] est libre de circuler dans la maison ou est-il confiné à certaines parties de la maison?

S'il est confiné, spécifier l'endroit: \_\_\_\_\_

32. **Depuis la confirmation du diagnostic** de [CAS DE COVID-19 INDEXÉ], est-ce que [NOM DE L'ANIMAL] a accès à la cuvette des toilettes (pour s'abreuver par exemple)?

Oui  Non

Si oui, veuillez préciser:

33. **Depuis la confirmation du diagnostic** de [CAS DE COVID-19 INDEXÉ], est-ce que [NOM DE L'ANIMAL] a développé de nouveaux problèmes de santé (cocher tout ce qui s'applique et noter la date de début, de fin et la durée des signes)?

- |                                                                  |                          |                        |
|------------------------------------------------------------------|--------------------------|------------------------|
| <input type="checkbox"/> Toux                                    | Date de début: jj/mmm/aa | Date de fin: jj/mmm/aa |
| <input type="checkbox"/> Écoulements nasaux                      | Date de début: jj/mmm/aa | Date de fin: jj/mmm/aa |
| <input type="checkbox"/> Difficultés respiratoires/essoufflement | Date de début: jj/mmm/aa | Date de fin: jj/mmm/aa |
| <input type="checkbox"/> Éternuements                            | Date de début: jj/mmm/aa | Date de fin: jj/mmm/aa |
| <input type="checkbox"/> Vomissements                            | Date de début: jj/mmm/aa | Date de fin: jj/mmm/aa |
| <input type="checkbox"/> Diarrhée                                | Date de début: jj/mmm/aa | Date de fin: jj/mmm/aa |
| <input type="checkbox"/> Faiblesse (léthargie)                   | Date de début: jj/mmm/aa | Date de fin: jj/mmm/aa |
| <input type="checkbox"/> Autre (veuillez décrire): _____         | Date de début: jj/mmm/aa | Date de fin: jj/mmm/aa |

34. Y a-t-il autre chose que nous devrions savoir au sujet de [NOM DE L'ANIMAL]? (Est-ce que l'animal a été en contact avec des gens de l'extérieur, des gens vulnérables, fait de la zoothérapie normalement, autres?)

## Questionnaire 2 – Étude COVID chats

Date de l'entrevue:

Nom de l'enquêteur:

### Informations sur le foyer

1. Numéro d'identification du foyer:

2. Qui fournit l'information?

Cas de COVID-19 confirmé

Autre, lien avec le cas confirmé: \_\_\_\_\_

3. **Depuis notre première visite**, y a-t-il eu des changements dans le nombre de personnes qui vivent dans ce foyer présentement? \_\_ \_\_\_\_\_

4. **Depuis notre première visite**, y a-t-il eu des changements dans le nombre d'animaux de compagnie qui vivent dans ce foyer? (incluant les animaux d'assistance et aussi tous les animaux qui vivent principalement à l'extérieur si les membres du foyer les considèrent comme des animaux domestiques et qu'ils interagissent avec eux régulièrement)

aucun

chats # \_\_\_\_\_

chiens # \_\_\_\_\_

autre (préciser) \_\_\_\_\_

### Informations sur les personnes infectées par la COVID-19 dans le foyer

5. **Depuis notre première visite**, y a-t-il des personnes additionnelles dans ce foyer qui ont reçu un diagnostic de COVID-19? \_\_\_\_\_

*Si non, compléter seulement pour le premier cas confirmé (cas index) et sauter les questions 7 à 11)*

6. **Depuis notre première visite** [CAS DE COVID-19 INDEXÉ] a-t-il eu des symptômes qui peuvent être attribuable à la COVID-19 à la COVID-19?

- Aucun signe clinique
- Fièvre - Date de début: jj/mmm/aa    Date de fin: jj/mmm/aa
- Toux - Date de début: jj/mmm/aa    Date de fin: jj/mmm/aa
- Difficultés respiratoires ou essoufflement - Date de début: jj/mmm/aa    Date de fin: jj/mmm/aa
- Perte de l'odorat et du goût - Date de début: jj/mmm/aa    Date de fin: jj/mmm/aa :
- Fatigue intense - Date de début: jj/mmm/aa    Date de fin: jj/mmm/aa
- Diarrhée ou vomissements - Date de début: jj/mmm/aa    Date de fin: jj/mmm/aa
- Autres (veuillez préciser): \_\_\_\_\_ - Date de début: jj/mmm/aa    Date de fin: jj/mmm/aa

7. *Le jour de l'échantillonnage* : [CAS DE COVID-19 INDEXÉ] a-t-il des symptômes attribuables à la COVID-19 aujourd'hui?

- Aucun signe clinique
- Toux
- Écoulements nasaux
- Éternuements
- Difficultés respiratoires ou essoufflement
- Diarrhée
- Vomissements
- Léthargie
- Autres (veuillez préciser): \_\_\_\_\_

**Information sur le chat du foyer (*compléter ces questions pour chaque chat*)**

8. **Depuis notre dernière visite**, est-ce que les personnes infectées par la COVID-19 ont changé la fréquence et le type de contact avec [NOM DE L'ANIMAL]?

- Oui
- Non

→ 9. **Depuis notre visite, pendant ces interactions**, [CAS DE COVID-19] portait-il un équipement de protection individuelle (ex. gants ou couvre-visage)?

- Oui     Non

Si oui, veuillez préciser:

10. **Depuis notre dernière visite, avant ces interactions,** [CAS DE COVID-19 INDEXÉ] se lave-t-il toujours les mains?

Oui  Non

Si oui, veuillez préciser:

11. **Depuis notre dernière visite,** est-ce que [NOM DE L'ANIMAL] est libre de circuler à l'extérieur?

Oui  Non

Si oui, veuillez préciser:

12. **Depuis notre dernière visite,** est-ce que [NOM DE L'ANIMAL] est libre de circuler dans la maison ou est-il confiné à certaines parties de la maison? \_\_\_\_\_ S'il est confiné, spécifier l'endroit: \_\_\_\_\_

13. **Depuis notre dernière visite,** est-ce que [NOM DE L'ANIMAL] a accès à la cuvette des toilette (pour s'abreuver par exemple)?

Oui  Non

Si oui, veuillez préciser:

*Si plus d'un animal dans le foyer :*

14. **Depuis notre dernière visite,** combien y a-t-il eu de jours où [NOM DE L'ANIMAL] interagissait avec les autres animaux domestiques de la maison pour (...)?

|                                                      | Nombre de jours parmi les 7 jours |
|------------------------------------------------------|-----------------------------------|
| Jouer ensemble                                       |                                   |
| Dormir/se reposer ensemble                           |                                   |
| Lavage et léchage mutuel                             |                                   |
| Contact avec l'urine ou les fèces des autres animaux |                                   |



|                                                                       |  |
|-----------------------------------------------------------------------|--|
| Partager de la nourriture dans un même bol (en même temps? Oui / Non) |  |
| Autre contact (précisez) :                                            |  |

→ 15. **Depuis notre dernière visite**, est-ce que [NOM DE L'ANIMAL] a développé de nouveaux problèmes de santé (cocher tout ce qui s'applique et noter la date de début, de fin et la durée des signes)?

- |                                                                  |                          |                        |
|------------------------------------------------------------------|--------------------------|------------------------|
| <input type="checkbox"/> Toux                                    | Date de début: jj/mmm/aa | Date de fin: jj/mmm/aa |
| <input type="checkbox"/> Écoulements nasaux                      | Date de début: jj/mmm/aa | Date de fin: jj/mmm/aa |
| <input type="checkbox"/> Difficultés respiratoires/essoufflement | Date de début: jj/mmm/aa | Date de fin: jj/mmm/aa |
| <input type="checkbox"/> Éternuements                            | Date de début: jj/mmm/aa | Date de fin: jj/mmm/aa |
| <input type="checkbox"/> Vomissements                            | Date de début: jj/mmm/aa | Date de fin: jj/mmm/aa |
| <input type="checkbox"/> Diarrhée                                | Date de début: jj/mmm/aa | Date de fin: jj/mmm/aa |
| <input type="checkbox"/> Faiblesse (léthargie)                   | Date de début: jj/mmm/aa | Date de fin: jj/mmm/aa |
| <input type="checkbox"/> Autre (veuillez décrire): _____         | Date de début: jj/mmm/aa | Date de fin: jj/mmm/aa |

16. Y a-t-il autre chose que nous devrions savoir ou qui ont changé depuis notre dernière visite au sujet de [NOM DE L'ANIMAL]?
